# Supplementary material for: Shape controlled synthesis of superhydrophobic zinc coordination polymers particles and their calcination to superhydrophobic ZnO
Source: Royal Society of Chemistry journal article supplement (doi:10.1039/c1jm10957j), 2011-01-01
Supplement: c1jm10957j.pdf [file c1jm10957j.pdf]

## Electronic Supplementary Information (ESI) for

### Shape controlled synthesis of superhydrophobic Zinc coordination polymers particles and their calcination to superhydrophobic ZnO

Yuexiang Lu, Huaqiang Cao\*, Sichun Zhang, Xinrong Zhang\*

*Department of Chemistry, Key Laboratory for Atomic and Molecular Nanosciences of the Education Ministry, Tsinghua University, Beijing, 100084 (China)*

\*Corresponding authors: E-mail: hqcao@mail.tsinghua.edu.cn & xrzhang@mail.tsinghua.edu.cn

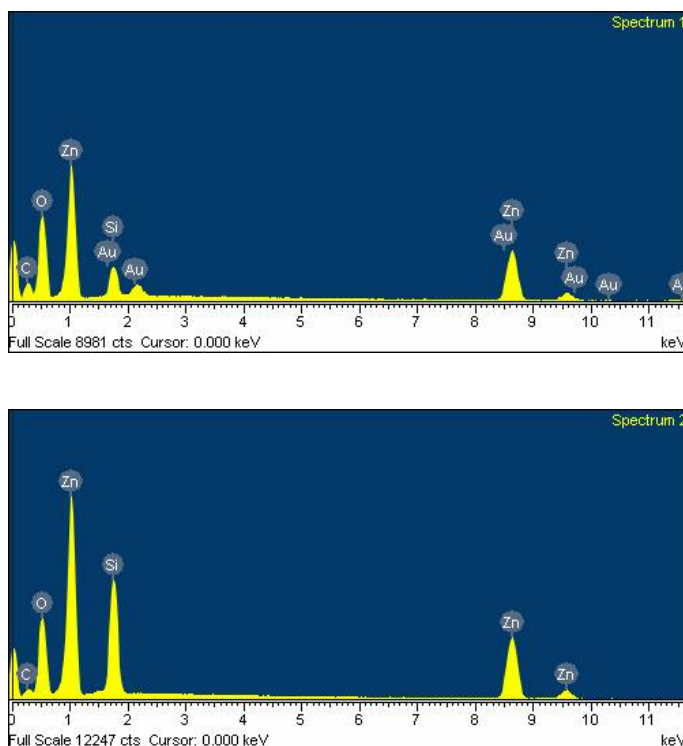

**Figure S1.** EDX spectra: spectrum-1 of **Zn-CPP-1** and spectrum-2 of **Zn-CPP-3**.

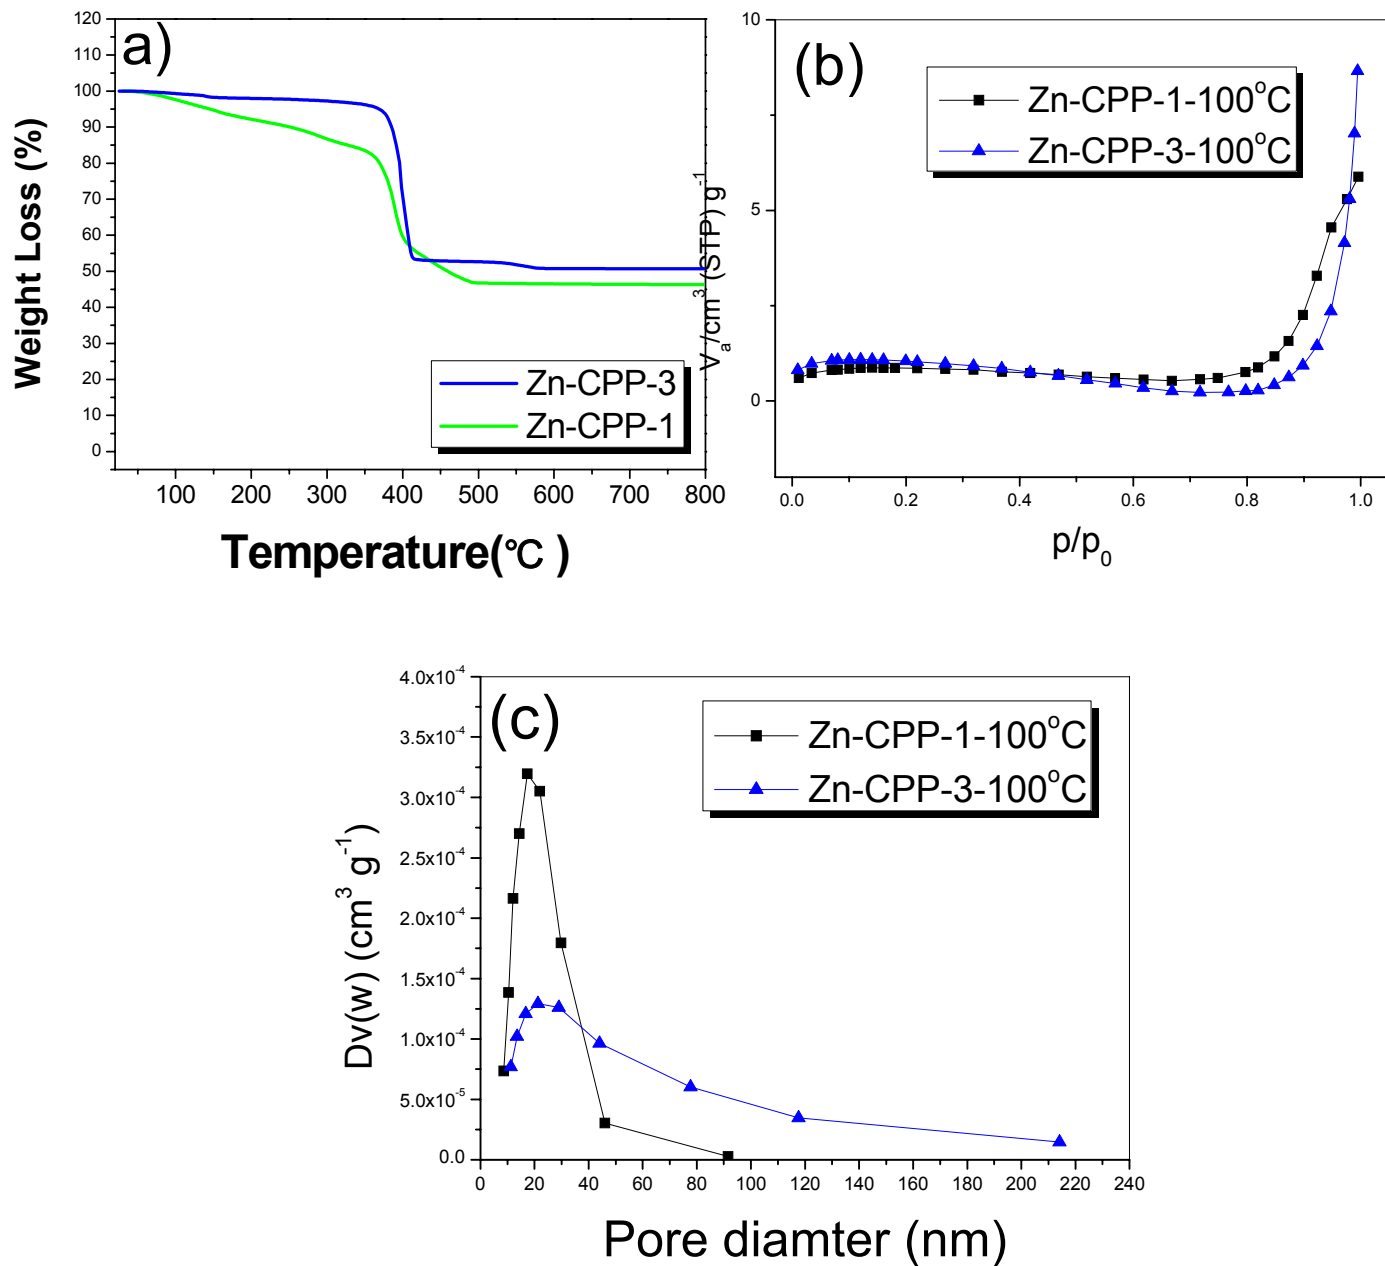

**Figure S2.** a) TGA curves of **Zn-CPP-1** and **Zn-CPP-3**, b) Adsorbing isotherms of **Zn-CPP-1** and **Zn-CPP-3** for nitrogen measured at 77 K. c) BJH pore size distribution of **Zn-CPP-1** and **Zn-CPP-3**.
